# Supplementary material
Source: PubMed Central journal article supplement (PMC2926943)
Supplement: NIHMS222031-supplement-Supplementary_Data.pdf [file NIHMS222031-supplement-Supplementary_Data.pdf]

**Supplementary Material**

**Concerted evolution of structure and function in a miniature  
protein**

Jason W. Chin and Alanna Schepartz\*

Department of Chemistry

Yale University

New Haven, CT 06520-8107, USA

\* To whom correspondence should be addressed.

**NMR Spectroscopy.** p007 was dissolved at a concentration of approximately 1.5 mM in 90% $\text{H}_2\text{O}$ /10% $\text{D}_2\text{O}$  containing 4 mM KCl, 205 mM NaCl, 6.5 mM  $\text{Na}_2\text{HPO}_4$ , 2.1 mM  $\text{KH}_2\text{PO}_4$  (pH 7.4). Chemical shifts were referenced in ppm from the internal standard 3- (trimethylsilyl)propionic-2,2,3,3- $\text{d}_4$  acid, sodium salt.

All spectra were recorded on a Varian 800 MHz Inova instrument at 2 °C with a sweep width of 9000 Hz. NOESY experiments were performed using a waterflip-watergate pulse sequence[ 1] for water suppression with 4096 $t_2$  x 500  $t_1$  complex points. Data was acquired at mixing times of 50, 150 and 300 ms. DQF-COSY spectra (with a 60 ms mixing time) were acquired with 2048 $t_2$  x 300 $t_1$  complex points.

Data processing was performed on a Silicon Graphics Workstation using Felix 98 (MSI Inc.). Prior to Fourier transform of the free induction decays, a Gaussian window function[2] was applied to NOESY spectra, while a Kaiser window function[2] was applied to DQF-COSY spectra. The digital resolution of the NOESY spectra was 2.2 Hz/pt. DQF COSY data was zero filled to yield a 8192 x 8192 matrix with a digital resolution of 1.1 Hz/pt. Spectra were assigned by standard methods[3].

**Table S1.** <sup>1</sup>H-NMR assignments for p007

| Residue | NH   | C H  | C H                          | other                                            |
|---------|------|------|------------------------------|--------------------------------------------------|
| Gly 1   |      |      |                              |                                                  |
| Gly 2   | 8.61 | 4.09 |                              |                                                  |
| Ser 3   | 8.59 | 4.51 | 3.88, 3.91                   |                                                  |
| Arg 4   | 8.59 | 4.39 | 1.67, 1.80, 1.9 <sup>a</sup> | C H 3.23, N H 7.29                               |
| Ala 5   | 8.52 | 4.34 | 1.41                         |                                                  |
| Thr 6   | 8.27 | 4.32 | 4.18                         | C H 1.21                                         |
| Met 7   | 8.62 | 4.82 | 1.97                         | C H 2.56, 2.67 C H 2.08                          |
| Pro 8   |      | 4.41 | 1.93                         | C H 2.01, 2.07, 2.33 <sup>a</sup> C H 3.68, 3.83 |
| Gly 9   | 8.69 | 3.99 |                              |                                                  |
| Asp 10  | 8.29 | 4.59 | 2.75, 2.67                   |                                                  |
| Asp 11  | 8.48 | 4.61 | 2.61, 2.69                   |                                                  |
| Ala 12  | 8.16 | 4.56 | 1.38                         |                                                  |
| Pro 13  |      | 4.48 | 1.93                         | C H 2.03, 2.09, 2.32 <sup>a</sup> C H 3.66, 3.81 |
| Val 14  | 8.45 | 4.01 | 2.09                         | C H 0.97, 0.99                                   |
| Glu 15  | 8.72 | 4.23 | 1.97, 2.03                   | C H 2.26, 2.29                                   |

## S4

| Residue | NH   | C H  | C H                           | other                  |
|---------|------|------|-------------------------------|------------------------|
| Asp 16  | 8.41 | 4.59 | 2.65, 2.74                    |                        |
| Leu 17  | 8.31 | 4.28 | 1.66, 1.75 <sup>a</sup>       | C H 0.89, 0.96         |
| Lys 18  | 8.32 | 4.14 | 1.60, 1.70, 1.86 <sup>b</sup> | C H 1.39, 1.49 C H 3.0 |
| Arg 19  | 8.10 | 4.19 | 1.81, 1.91 <sup>a</sup>       | C H 3.17 N H 7.36      |
| Phe 20  | 8.26 | 4.57 | 3.14, 3.22                    | C H 7.29 C H 7.37      |
| Arg 21  | 8.37 | 4.15 | 1.66, 1.77, 1.88 <sup>a</sup> | C H 3.22 N H 7.29      |
| Asn 22  | 8.45 | 4.79 | 2.86 2.96                     | NH <sub>2</sub> 7.81   |
| Thr 23  | 8.02 | 4.48 | 4.3                           | C H 1.31               |
| Leu 24  | 8.41 | 4.07 | 1.56, 1.66 <sup>a</sup>       | C H 0.88, 0.92         |
| Ala 25  | 8.37 | 4.11 | 1.47                          |                        |
| Ala 26  | 8.03 | 4.17 | 1.46                          |                        |
| Arg 27  | 8.31 | 4.05 | 1.69, 1.85, 1.97 <sup>a</sup> | C H 3.17 N H 7.19      |
| Arg 28  | 8.52 | 4.21 | 1.66, 1.84, 1.92 <sup>a</sup> | N H 7.33               |
| Ser 29  | 8.25 | 4.29 | 4.02                          |                        |
| Arg 30  | 8.25 | 4.15 | 1.65, 1.9, 1.97 <sup>a</sup>  | C H 3.32 N H 7.42      |
| Ala 31  | 8.13 | 4.28 | 1.53                          |                        |
| Arg 32  | 8.28 | 4.21 | 1.65, 1.83, 1.95 <sup>a</sup> | N H 7.41               |

| Residue | NH   | C H  | C H                                    | other             |
|---------|------|------|----------------------------------------|-------------------|
| Lys 33  | 8.18 | 4.10 | 1.60, 1.71, 1.85,<br>1.92 <sup>b</sup> | C H 1.45 C H 3.01 |
| Ala 34  | 8.20 | 4.26 | 1.49                                   |                   |
| Ala 35  |      |      | 1.5                                    |                   |
| Arg 36  |      |      | 1.66, 1.78, 1.88 <sup>a</sup>          |                   |
| Ala 37  | 8.12 | 4.26 | 1.48                                   |                   |
| Ala 38  | 8.07 | 4.25 | 1.47                                   |                   |
| Ala 39  | 7.93 | 4.25 | 1.47                                   |                   |

a) or proton, b) or proton.

**Table S2.** Long range (*i*, *i*+5 and longer) NOEs observed in p007.

G2 C H R30 C H

G2 C H S29 C H

R4 C H R27 C H

A5 C H F20 C H

M7 NH L17 C H

M7 C H F20 C H

M7 C H F20 C H

M7 C H    F20 C H

M7 C H    F20 C H

P8 C H    17 C H

P8 C H    20 C H

**Figure S1.** The alpha-amide region of p007 in a 300 ms NOESY spectrum.

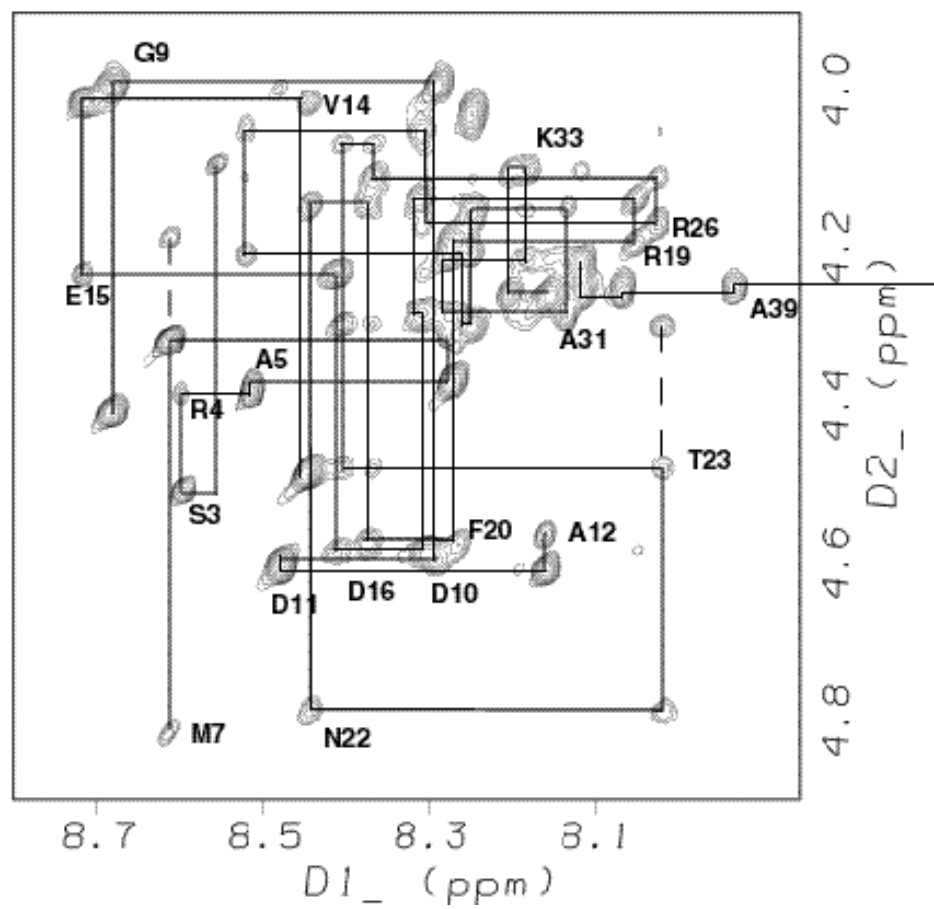

**Figure S2.** The amide-amide region of p007 in a 300 ms NOESY spectrum.

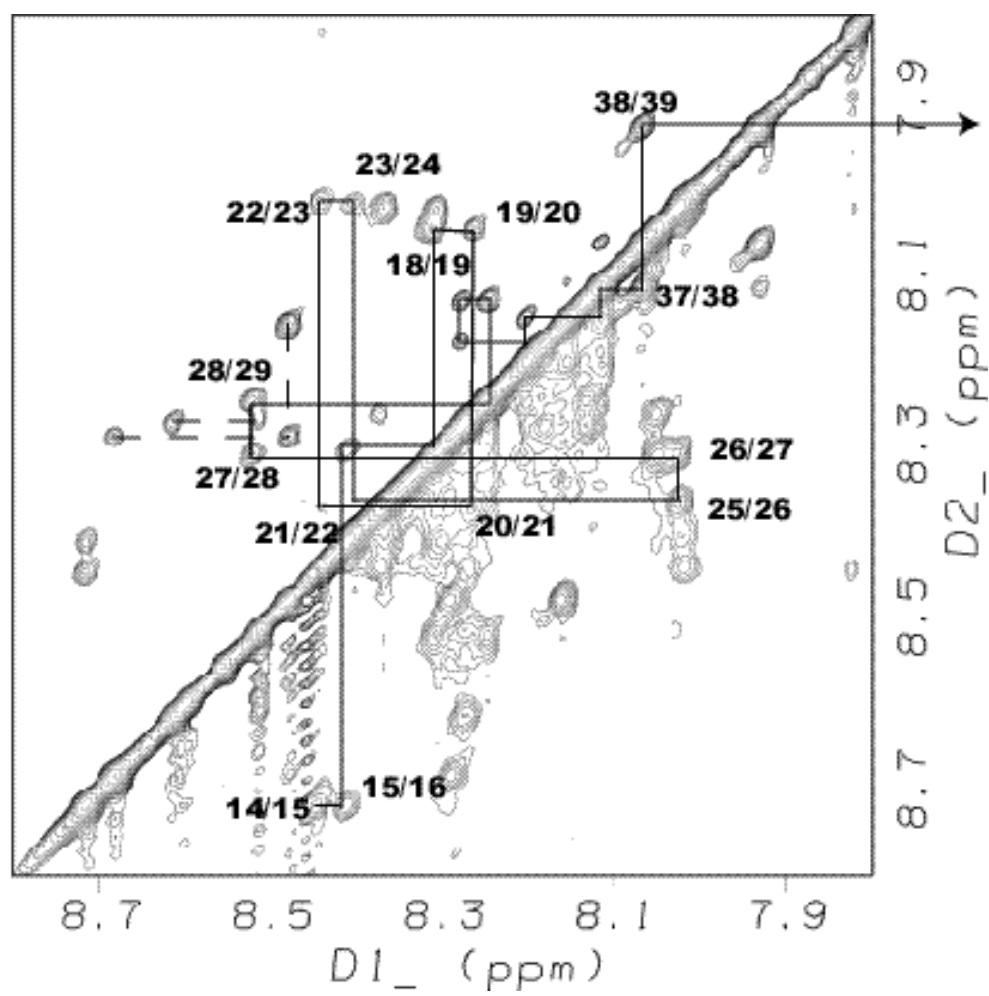

**Figure S3.** A summary of short and medium range NOEs for p007. A bar indicates NOE connectivity between protons on different residues. For the  $\alpha$ N, NN or  $\beta$ N the height of the bar indicates the classification of the NOE as strong medium or weak.

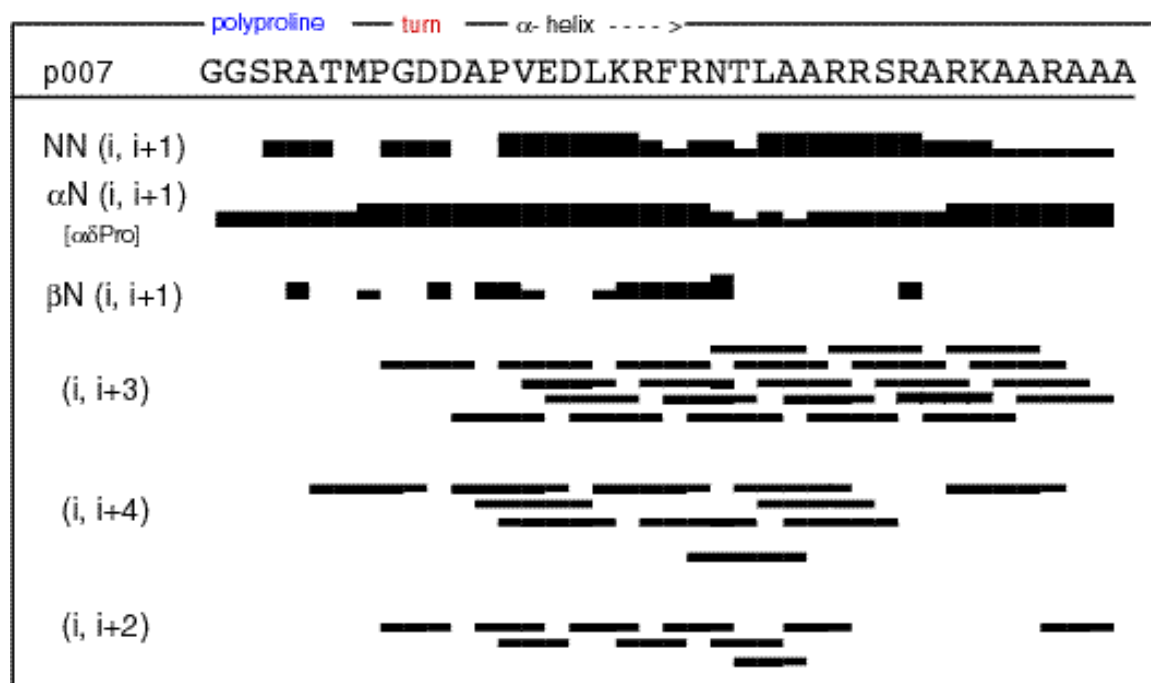

**Figure S4.** Long range NOEs observed for p007 in a 300 ms NOESY.

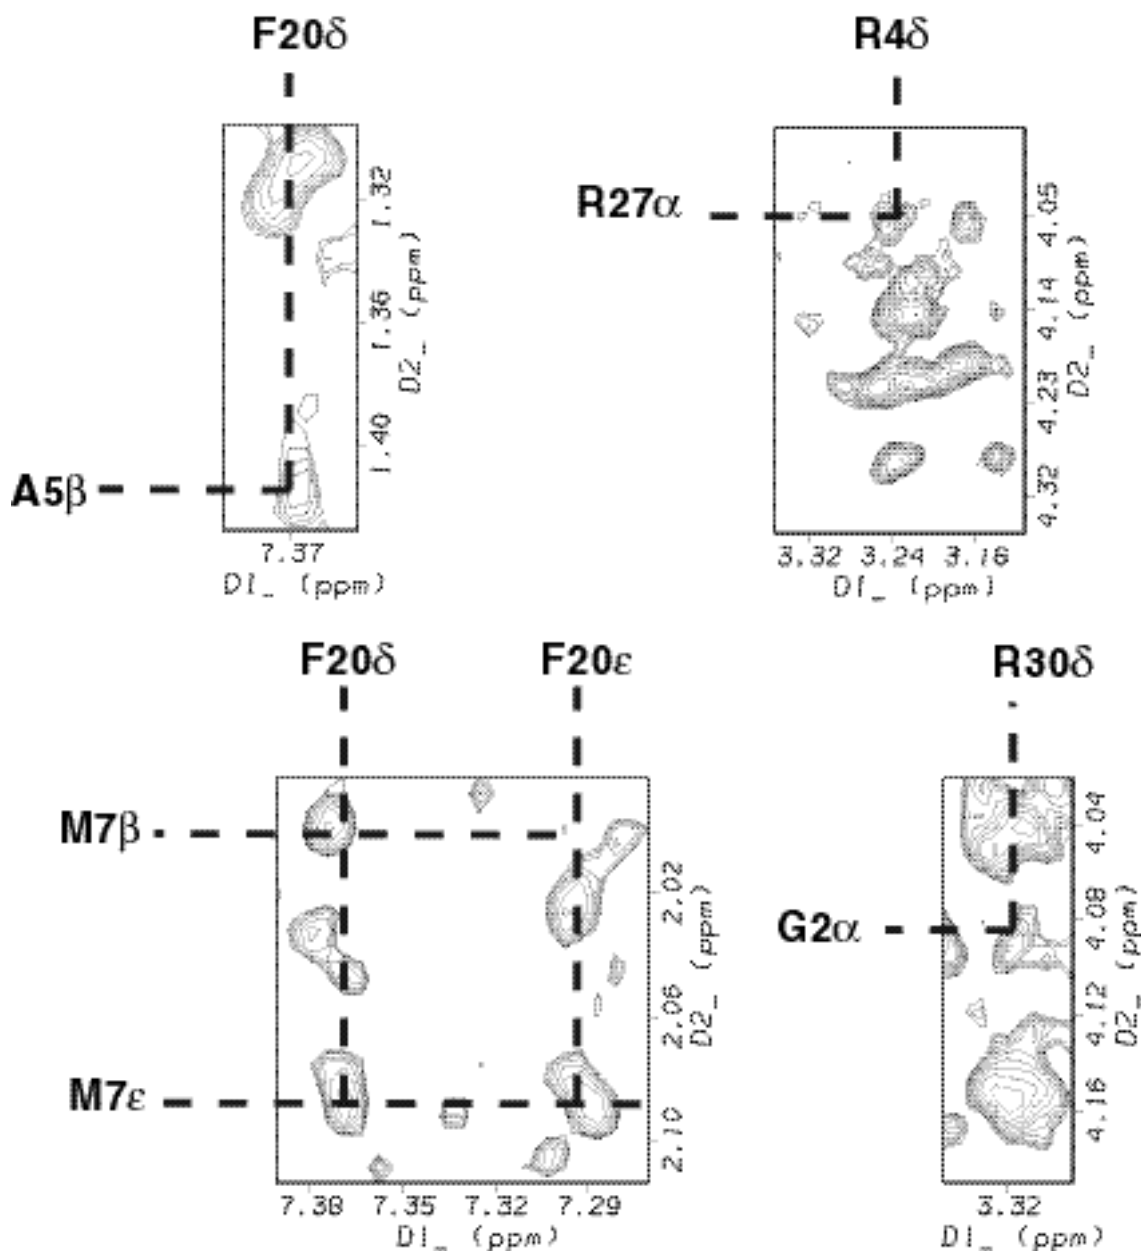

**References:**

1. Piotto, M., Saudek, V., and Sklenar, V. (1992) *Journal of Biomolecular NMR* 2, 661-665.
2. Canvanagh, J., Fairbrother, W. J., Palmer, A. G., and Skelton, N. J. (1996) *Protein NMR spectroscopy*, Academic Press, New York.
3. Wüthrich, K. (1986) *NMR of proteins and nucleic acids*, Wiley, New York.
